# Supplementary material for: Complex groundwater flow systems as traveling agent models
Source: PeerJ journal article supplement (doi:10.7717/peerj.557), 2014-10-16
Supplement: ESM.pdf [file ESM.pdf]

# Electronic Supplementary Materials for Complex groundwater flow systems as a traveling agent models

López-Corona O. <sup>1\*</sup>, Escolero O. <sup>2</sup>, Padilla P. <sup>3</sup>, González T. <sup>4</sup> and Morales E. <sup>2</sup>

<sup>1</sup>Posgrado en Ciencias de la Tierra, Instituto de Geología, Universidad Nacional Autónoma de México, Circuito Escolar, Cd. Universitaria México D.F.

<sup>2</sup> Instituto de Geología, Universidad Nacional Autónoma de México, Circuito Escolar, Cd. Universitaria México D.F.

<sup>3</sup>IIMAS, Universidad Nacional Autónoma de México, Circuito Escolar, Cd. Universitaria México D.F.

<sup>4</sup> Instituto de Geofísica, Universidad Nacional Autónoma de México, Circuito Escolar, Cd. Universitaria México D.F.

\*oliverlc@geologia.unam.mx

## Derivation of the Flow Equations

Lets consider a group of agents moving in a square lattice according with a strategy  $e$  function of actual location and neighbors density. The probability of finding an agent in an arbitrary node  $(i\Delta x, j\Delta y)$  at the time  $k\Delta t$ , as in Figure 1, is

$$P(i\Delta x, j\Delta y, k\Delta t). \quad (1)$$

The probability of an agent originally in  $(i_0\Delta x, j_0\Delta y)$  at the time  $k_0\Delta t$  walk to  $(i\Delta x, j\Delta y)$  at the next time  $k\Delta t = (k+1)\Delta t$  is

$$\begin{aligned} P(i\Delta x, j\Delta y, k\Delta t) - P(i_0\Delta x, j_0\Delta y, k_0\Delta t) &= e_{Uij}^t [P(i\Delta x, (j+1)\Delta y, k\Delta t) - P(i_0\Delta x, j_0\Delta y, k_0\Delta t)] \\ &+ e_{Dij}^t [P(i\Delta x, (j-1)\Delta y, k\Delta t) - P(i_0\Delta x, j_0\Delta y, k_0\Delta t)] \\ &+ e_{Rij}^t [P((i+1)\Delta x, j\Delta y, k\Delta t) - P(i_0\Delta x, j_0\Delta y, k_0\Delta t)] \\ &+ e_{Lij}^t [P((i-1)\Delta x, j\Delta y, k\Delta t) - P(i_0\Delta x, j_0\Delta y, k_0\Delta t)] \end{aligned} \quad (2)$$

Where  $e_{dij}^t$  is the strategy that the agent adopt based on the density neighbors difference between his actual position and the next one in  $d$  direction, so

$$\begin{aligned} e_{Uij}^t &= e \left( \left\| (\nabla P)_{i,j+1}^t \right\| \right) \\ e_{Dij}^t &= e \left( \left\| (\nabla P)_{i,j-1}^t \right\| \right) \\ e_{Rij}^t &= e \left( \left\| (\nabla P)_{i+1,j}^t \right\| \right) \\ e_{Lij}^t &= e \left( \left\| (\nabla P)_{i-1,j}^t \right\| \right) \end{aligned} \quad (3)$$

If we define  $\delta P_{Uij}^t = P(i\Delta x, (j+1)\Delta y, k\Delta t) - P(i_0\Delta x, j_0\Delta y, k_0\Delta t)$ , and so for the rest of directions, then Eq.2 became

$$P(i\Delta x, j\Delta y, k\Delta t) = P(i_0\Delta x, j_0\Delta y, k_0\Delta t) + e_{Uij}^t \delta P_{Uij}^t + e_{Dij}^t \delta P_{Dij}^t + e_{Rij}^t \delta P_{Rij}^t + e_{Lij}^t \delta P_{Lij}^t. \quad (4)$$

Which is the discrete form of the anisotropic diffusion equation[1]

$$\frac{\partial P(x, y, t)}{\partial t} = \text{div} [e(\|\nabla P\|) \nabla P]. \quad (5)$$

The discrete anisotropic diffusion equation 4 could be rewritten as[2]

$$P_a^{t+1} = P_a^t + \frac{\lambda}{|\eta_a|} \sum_{b \in \eta_a} e(\delta P_{a,b}) \delta P_{a,b} \quad (6)$$

with  $a$  the actual position,  $\eta_s$  the neighboring position of  $a$ ,  $|\eta_a|$  the number of first neighbors of the the agent in  $a$  and  $\lambda \in \mathbb{R}^+$  a constant that define the diffusion rate.

Of course, the functional form of  $e_{dij}^t$  could be a more generic one as

$$e_{dij}^t = e_{dij}^t(x, y, t) \quad (7)$$

|   |   |   |
|---|---|---|
|   | C | D |
| C | R | S |
| D | T | P |

Tab. 1: Canonical payoff matrix for classical Prisoner's dilemma. Where T stands for Temptation to defect, R for Reward for mutual cooperation, P for Punishment for mutual defection and S for Sucker's payoff. To be defined as prisoner's dilemma, the following inequalities must hold:  $T > R > P > S$

in which case the general anisotropic diffusion equation is obtained

$$\frac{\partial P(x, y, t)}{\partial t} = \text{div} [e(x, y, t) \nabla P] = \nabla e \cdot \nabla P + e(x, y, t) \nabla^2 P. \quad (8)$$

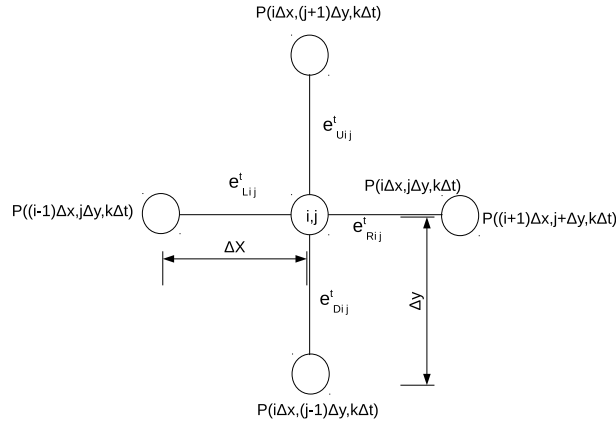

Fig. 1: Diagram1

Even more, one could extend this analysis to a  $n$  players game and use the Evolutionary Theory of Nowak. In that context, if we relate  $e$  with a particular game with payoff matrix  $A$ , and then  $e^t_{hij}$  is the fraction of agents in the  $(i, j)$  position that adopt strategy  $h$  at time  $t$ . The corresponding replication equation is then

$$e^k_{hij} \Delta t - e^{k_0}_{hij} \Delta t = e^{k_0}_{hij} \Delta t (f_h - \phi_h) \quad (9)$$

where  $f_h$ ,  $\phi_h$  are the fitness and mean fitness of strategy  $h$ .

As an example, let be the matrix  $A$  with elements  $a_{hh'}$  the payoff of a Prisoner's dilemma game given in Table, then the corresponding fitness are

$$\begin{aligned} h = C &\Rightarrow f_C = (R) e^{k_0}_{hij} \Delta t + (S) e^{k_0}_{hij} \Delta t \\ h = D &\Rightarrow f_D = (T) e^{k_0}_{hij} \Delta t + (P) e^{k_0}_{hij} \Delta t \end{aligned} \quad (10)$$

And the mean fitness is

$$\begin{aligned} \phi &= \sum_{\gamma} f_{\gamma} e^{\gamma}_{hij} e^{k_0}_{\gamma(i+1)j} + \dots \\ &+ \sum_{\gamma} f_{\gamma} e^{\gamma}_{hij} e^{k_0}_{\gamma(i-1)j} + \dots \\ &+ \sum_{\gamma} f_{\gamma} e^{\gamma}_{hij} e^{k_0}_{\gamma i(j+1)} + \dots \\ &+ \sum_{\gamma} f_{\gamma} e^{\gamma}_{hij} e^{k_0}_{\gamma i(j-1)} \end{aligned} \quad (11)$$

Taking into account equations 10 and 11 and that  $e^k_{hij} \Delta t - e^{k_0}_{hij} \Delta t$  is the discrete form of the time derivative, the replicator equation can be rewritten [3] in matrix form as

$$\frac{dE}{dt} = [\Lambda(t), E(t)]. \quad (12)$$

Where  $E$ ,  $\Lambda$  are two matrix with elements

$$E_{hh'} = (e_h e_{h'})^{1/2} \quad (13)$$

and

$$\Lambda_{hh'} = \frac{1}{2} \left[ \left( \sum_{k=1}^n a_{hk} e_k \right) (e_h e_{h'})^{1/2} - (e_h e_{h'})^{1/2} \left( \sum_{k=1}^n a_{hk} e_k \right) \right], \quad (14)$$

and the square brackets  $[\ ]$  in equation 12, stands for commutation operation. It has been demonstrated that quantum game theory is a generalization of game theory and that the replicator equation 12 is equivalent to von Neumann equation

$$i\hbar \frac{d\rho}{dt} = [H, \rho] \quad (15)$$

Where  $\rho$  is the density matrix, a self-adjoint (or Hermitian) positive-semidefinite matrix of trace one, that describes the statistical state of a quantum system. The  $H$  operator is the hamiltonian of the system. The equivalence between the replicator and von Neumann equations are given by [3]

$$E \leftrightarrow \rho, \quad \Lambda \leftrightarrow -\frac{i}{\hbar} H. \quad (16)$$

Via the master equation, it can be demonstrated [4, 5, 6] that the von Neumann equation leads to a Fokker-Planck equation of the form

$$\frac{\partial e(x, y, t)}{\partial t} = -div [D_1(x, y, t) e(x, y, t)] + \nabla [D_2(x, y, t) e(x, y, t)] \quad (17)$$

where  $D_1$  and  $D_2$  are traditionally associated with drift and diffusion.

In this game theory context  $D_1(x, y, t)$  is associated with the fitness  $f(x, y, t)$  (Eq.10) and  $D_2(x, y, t)$  with the mean fitness  $\phi(x, y, t)$  (Eq.11).

The master equation is a first-order differential equation that describe the time evolution of the probability of the system to be in a particular set of states. Typically the master equation is given by

$$\frac{d\vec{P}}{dt} = A(t) \vec{P} \quad (18)$$

where  $\vec{P}$  is a column vector of the states  $i$ , and  $A(t)$  is the matrix of connections. Many physical problems in classical, quantum mechanics and other sciences, can be expressed in terms of a master equation. Examples of these are the Lindblad equation in quantum mechanics and as we mention above, the Fokker-Planck equation which describes the time evolution of a continuous probability distribution. For more hydrologically applications of the master equation the reader may refer to [7].

We can finally enunciate the discrete spatially extended game in continuum terms. The probability of finding an agent in the position  $(x, y)$  at the time  $t$  is given by

$$\frac{\partial P(x, y, t)}{\partial t} = div [e(x, y, t) \nabla P]. \quad (19)$$

Where  $e(x, y, t)$  is the strategy that the player in  $(x, y)$  plays at the time  $t$  and that obeys the equation

$$\frac{\partial e(x, y, t)}{\partial t} = -div [D_1(x, y, t) e(x, y, t)] + \nabla^2 [D_2(x, y, t) e(x, y, t)]. \quad (20)$$

## References

- [1] Perona, P. and Malik, J., 1990, Scale-space and edge detection using anisotropic diffusion, IEEE Trans. Pattern Anal. Machine Intell. Vol 12(7).
- [2] Black, M. and Marimott D., 1998, Robust Anisotropic Diffusion, IEEE Trans. on image processing. Vol 7(3)
- [3] Quevara, E., 2005, Quantum Replicator Dynamics, arXiv:quant-ph/0510238v7
- [4] Kenkre, V. M. 2003. Memory formalism, nonlinear techniques, and kinetic equation approaches, in V. M. Kenkre and K. Lindenberg (Eds.), Modern Challenges in Statistical Mechanics, Patterns, Noise, and the interplay of Nonlinearity and Complexity, AIP Conference Proceedings volume 658, American Institute of Physics, Melville, NY, USA.
- [5] Curado, W. and Nobre, F., 2003, Derivation of nonlinear Fokker-Planck equations by means of approximations to the master equation, PHYSICAL REVIEW E 67, 021107
- [6] Claussen, J., 2008, Discrete stochastic processes, replicator and Fokker-Planck equations of coevolutionary dynamics in finite and infinite populations, arXiv:0803.2443v1 [q-bio.PE]

- 
- [7] Berkowitz, B., Cortis, A., Dentz, M. and Scher, H. 2006, Modeling non-Fickian transport in geological formation as a continuous time random walk, *Rev. Geophys.* 44
